# Supplementary material for: Multiple Introductions Followed by Ongoing Community Spread of SARS-CoV-2 at One of the Largest Metropolitan Areas of Northeast Brazil
Source: MDPI journal article supplement (doi:10.3390/v12121414), 2020-12-09
Supplement: s1 [file s1]

NC 045512.2 Severe acute respiratory syndrome coronavirus 2 (SARS-CoV-2) [GenBank]

hCoV-19/Brazil/PE-AM138/2020  
hCoV-19/Brazil/PE-AM08/2020  
hCoV-19/Brazil/PE-AM221/2020  
hCoV-19/Brazil/PE-AM1010/2020  
hCoV-19/Brazil/PE-AM1103/2020  
hCoV-19/Brazil/PE-AM139/2020  
hCoV-19/Brazil/PE-AM158/2020  
hCoV-19/Brazil/PE-AM16/2020  
hCoV-19/Brazil/PE-AM167/2020  
hCoV-19/Brazil/PE-AM17/2020  
hCoV-19/Brazil/PE-AM171/2020  
hCoV-19/Brazil/PE-AM18/2020  
hCoV-19/Brazil/PE-AM19/2020  
hCoV-19/Brazil/PE-AM203/2020  
hCoV-19/Brazil/PE-AM211/2020  
hCoV-19/Brazil/PE-AM212/2020  
hCoV-19/Brazil/PE-AM215/2020  
hCoV-19/Brazil/PE-AM220/2020  
hCoV-19/Brazil/PE-AM226/2020  
hCoV-19/Brazil/PE-AM230/2020  
hCoV-19/Brazil/PE-AM235/2020  
hCoV-19/Brazil/PE-AM238/2020  
hCoV-19/Brazil/PE-AM239/2020  
hCoV-19/Brazil/PE-AM273/2020  
hCoV-19/Brazil/PE-AM29/2020  
hCoV-19/Brazil/PE-AM291/2020  
hCoV-19/Brazil/PE-AM30/2020  
hCoV-19/Brazil/PE-AM305/2020  
hCoV-19/Brazil/PE-AM307/2020  
hCoV-19/Brazil/PE-AM311/2020  
hCoV-19/Brazil/PE-AM355/2020  
hCoV-19/Brazil/PE-AM356/2020  
hCoV-19/Brazil/PE-AM39/2020  
hCoV-19/Brazil/PE-AM48/2020  
hCoV-19/Brazil/PE-AM67/2020  
hCoV-19/Brazil/PE-AM84/2020  
hCoV-19/Brazil/PE-AM87/2020  
hCoV-19/Brazil/PE-AM89/2020  
hCoV-19/Brazil/PE-AM1447/2020  
hCoV-19/Brazil/PE-AM1451/2020  
hCoV-19/Brazil/PE-AM1459/2020  
hCoV-19/Brazil/PE-AM1983/2020  
hCoV-19/Brazil/PE-AM384/2020  
hCoV-19/Brazil/PE-AM391/2020  
hCoV-19/Brazil/PE-AM395/2020  
hCoV-19/Brazil/PE-AM397/2020  
hCoV-19/Brazil/PE-AM404/2020  
hCoV-19/Brazil/PE-AM448/2020  
hCoV-19/Brazil/PE-AM458/2020  
hCoV-19/Brazil/PE-AM474/2020  
hCoV-19/Brazil/PE-AM479/2020  
hCoV-19/Brazil/PE-AM495/2020  
hCoV-19/Brazil/PE-AM544/2020  
hCoV-19/Brazil/PE-AM604/2020  
hCoV-19/Brazil/PE-AM620/2020  
hCoV-19/Brazil/PE-AM662/2020  
hCoV-19/Brazil/PE-AM707/2020  
hCoV-19/Brazil/PE-AM711/2020  
hCoV-19/Brazil/PE-AM714/2020  
hCoV-19/Brazil/PE-AM959/2020  
hCoV-19/Brazil/PE-AM959/2020  
hCoV-19/Brazil/PE-AM960/2020  
hCoV-19/Brazil/PE-AM961/2020  
hCoV-19/Brazil/PE-AM965/2020  
hCoV-19/Brazil/PE-AM967/2020  
hCoV-19/Brazil/PE-AM977/2020  
hCoV-19/Brazil/PE-AM981/2020  
hCoV-19/Brazil/PE-AM981/2020  
hCoV-19/Brazil/PE-AM992/2020  
hCoV-19/Brazil/PE-AM109/2020  
hCoV-19/Brazil/PE-AM1026/2020  
hCoV-19/Brazil/PE-AM1064/2020  
hCoV-19/Brazil/PE-AM1082/2020  
hCoV-19/Brazil/PE-AM1092/2020  
hCoV-19/Brazil/PE-AM1093/2020  
hCoV-19/Brazil/PE-AM1116/2020  
hCoV-19/Brazil/PE-AM1126/2020  
hCoV-19/Brazil/PE-AM1127/2020  
hCoV-19/Brazil/PE-AM1148/2020  
hCoV-19/Brazil/PE-AM1149/2020  
hCoV-19/Brazil/PE-AM1237/2020  
hCoV-19/Brazil/PE-AM1254/2020  
hCoV-19/Brazil/PE-AM1264/2020  
hCoV-19/Brazil/PE-AM1309/2020  
hCoV-19/Brazil/PE-AM1314/2020  
hCoV-19/Brazil/PE-AM1324/2020  
hCoV-19/Brazil/PE-AM1348/2020  
hCoV-19/Brazil/PE-AM1352/2020  
hCoV-19/Brazil/PE-AM1399/2020  
hCoV-19/Brazil/PE-AM1434/2020  
hCoV-19/Brazil/PE-AM1440/2020  
hCoV-19/Brazil/PE-AM719/2020  
hCoV-19/Brazil/PE-AM726/2020  
hCoV-19/Brazil/PE-AM766/2020  
hCoV-19/Brazil/PE-AM807/2020  
hCoV-19/Brazil/PE-AM889/2020  
hCoV-19/Brazil/PE-AM887/2020  
hCoV-19/Brazil/PE-AM900/2020  
hCoV-19/Brazil/PE-AM914/2020  
hCoV-19/Brazil/PE-AM939/2020  
hCoV-19/Brazil/PE-AM957/2020





|                                                                          | 14330 | 14340 | 14350 | 14360 | 14370 | 14380 | 14390 | 14400 | 14410 | 14420 | 14430 | 14440 | 14450 |
|--------------------------------------------------------------------------|-------|-------|-------|-------|-------|-------|-------|-------|-------|-------|-------|-------|-------|
| NC_045512.2 Severe acute respiratory syndrome coronavirus 2 (SARS-CoV-2) | A     | T     | G     | C     | T     | G     | T     | G     | C     | T     | G     | T     | G     |
| hCoV-19/Brazil/PE-IAM130/2020                                            | A     | T     | G     | C     | T     | G     | T     | G     | C     | T     | G     | T     | G     |
| hCoV-19/Brazil/PE-IAM081/2020                                            | A     | T     | G     | C     | T     | G     | T     | G     | C     | T     | G     | T     | G     |
| hCoV-19/Brazil/PE-IAM221/2020                                            | A     | T     | G     | C     | T     | G     | T     | G     | C     | T     | G     | T     | G     |
| hCoV-19/Brazil/PE-IAM10/2020                                             | A     | T     | G     | C     | T     | G     | T     | G     | C     | T     | G     | T     | G     |
| hCoV-19/Brazil/PE-IAM103/2020                                            | A     | T     | G     | C     | T     | G     | T     | G     | C     | T     | G     | T     | G     |
| hCoV-19/Brazil/PE-IAM117/2020                                            | A     | T     | G     | C     | T     | G     | T     | G     | C     | T     | G     | T     | G     |
| hCoV-19/Brazil/PE-IAM158/2020                                            | A     | T     | G     | C     | T     | G     | T     | G     | C     | T     | G     | T     | G     |
| hCoV-19/Brazil/PE-IAM16/2020                                             | A     | T     | G     | C     | T     | G     | T     | G     | C     | T     | G     | T     | G     |
| hCoV-19/Brazil/PE-IAM167/2020                                            | A     | T     | G     | C     | T     | G     | T     | G     | C     | T     | G     | T     | G     |
| hCoV-19/Brazil/PE-IAM17/2020                                             | A     | T     | G     | C     | T     | G     | T     | G     | C     | T     | G     | T     | G     |
| hCoV-19/Brazil/PE-IAM171/2020                                            | A     | T     | G     | C     | T     | G     | T     | G     | C     | T     | G     | T     | G     |
| hCoV-19/Brazil/PE-IAM18/2020                                             | A     | T     | G     | C     | T     | G     | T     | G     | C     | T     | G     | T     | G     |
| hCoV-19/Brazil/PE-IAM19/2020                                             | A     | T     | G     | C     | T     | G     | T     | G     | C     | T     | G     | T     | G     |
| hCoV-19/Brazil/PE-IAM209/2020                                            | A     | T     | G     | C     | T     | G     | T     | G     | C     | T     | G     | T     | G     |
| hCoV-19/Brazil/PE-IAM212/2020                                            | A     | T     | G     | C     | T     | G     | T     | G     | C     | T     | G     | T     | G     |
| hCoV-19/Brazil/PE-IAM212/2020                                            | A     | T     | G     | C     | T     | G     | T     | G     | C     | T     | G     | T     | G     |
| hCoV-19/Brazil/PE-IAM215/2020                                            | A     | T     | G     | C     | T     | G     | T     | G     | C     | T     | G     | T     | G     |
| hCoV-19/Brazil/PE-IAM220/2020                                            | A     | T     | G     | C     | T     | G     | T     | G     | C     | T     | G     | T     | G     |
| hCoV-19/Brazil/PE-IAM226/2020                                            | A     | T     | G     | C     | T     | G     | T     | G     | C     | T     | G     | T     | G     |
| hCoV-19/Brazil/PE-IAM230/2020                                            | A     | T     | G     | C     | T     | G     | T     | G     | C     | T     | G     | T     | G     |
| hCoV-19/Brazil/PE-IAM235/2020                                            | A     | T     | G     | C     | T     | G     | T     | G     | C     | T     | G     | T     | G     |
| hCoV-19/Brazil/PE-IAM238/2020                                            | A     | T     | G     | C     | T     | G     | T     | G     | C     | T     | G     | T     | G     |
| hCoV-19/Brazil/PE-IAM248/2020                                            | A     | T     | G     | C     | T     | G     | T     | G     | C     | T     | G     | T     | G     |
| hCoV-19/Brazil/PE-IAM273/2020                                            | A     | T     | G     | C     | T     | G     | T     | G     | C     | T     | G     | T     | G     |
| hCoV-19/Brazil/PE-IAM29/2020                                             | A     | T     | G     | C     | T     | G     | T     | G     | C     | T     | G     | T     | G     |
| hCoV-19/Brazil/PE-IAM291/2020                                            | A     | T     | G     | C     | T     | G     | T     | G     | C     | T     | G     | T     | G     |
| hCoV-19/Brazil/PE-IAM30/2020                                             | A     | T     | G     | C     | T     | G     | T     | G     | C     | T     | G     | T     | G     |
| hCoV-19/Brazil/PE-IAM305/2020                                            | A     | T     | G     | C     | T     | G     | T     | G     | C     | T     | G     | T     | G     |
| hCoV-19/Brazil/PE-IAM307/2020                                            | A     | T     | G     | C     | T     | G     | T     | G     | C     | T     | G     | T     | G     |
| hCoV-19/Brazil/PE-IAM311/2020                                            | A     | T     | G     | C     | T     | G     | T     | G     | C     | T     | G     | T     | G     |
| hCoV-19/Brazil/PE-IAM355/2020                                            | A     | T     | G     | C     | T     | G     | T     | G     | C     | T     | G     | T     | G     |
| hCoV-19/Brazil/PE-IAM356/2020                                            | A     | T     | G     | C     | T     | G     | T     | G     | C     | T     | G     | T     | G     |
| hCoV-19/Brazil/PE-IAM39/2020                                             | A     | T     | G     | C     | T     | G     | T     | G     | C     | T     | G     | T     | G     |
| hCoV-19/Brazil/PE-IAM48/2020                                             | A     | T     | G     | C     | T     | G     | T     | G     | C     | T     | G     | T     | G     |
| hCoV-19/Brazil/PE-IAM67/2020                                             | A     | T     | G     | C     | T     | G     | T     | G     | C     | T     | G     | T     | G     |
| hCoV-19/Brazil/PE-IAM84/2020                                             | A     | T     | G     | C     | T     | G     | T     | G     | C     | T     | G     | T     | G     |
| hCoV-19/Brazil/PE-IAM87/2020                                             | A     | T     | G     | C     | T     | G     | T     | G     | C     | T     | G     | T     | G     |
| hCoV-19/Brazil/PE-IAM95/2020                                             | A     | T     | G     | C     | T     | G     | T     | G     | C     | T     | G     | T     | G     |
| hCoV-19/Brazil/PE-IAM1447/2020                                           | A     | T     | G     | C     | T     | G     | T     | G     | C     | T     | G     | T     | G     |
| hCoV-19/Brazil/PE-IAM1451/2020                                           | A     | T     | G     | C     | T     | G     | T     | G     | C     | T     | G     | T     | G     |
| hCoV-19/Brazil/PE-IAM1468/2020                                           | A     | T     | G     | C     | T     |       |       |       |       |       |       |       |       |

|                               |   |   |   |   |   |   |   |   |   |   |   |   |   |   |   |   |   |   |   |   |   |   |   |   |   |   |   |   |   |   |   |   |   |   |   |   |   |   |   |   |   |   |   |   |   |   |   |   |   |
|-------------------------------|---|---|---|---|---|---|---|---|---|---|---|---|---|---|---|---|---|---|---|---|---|---|---|---|---|---|---|---|---|---|---|---|---|---|---|---|---|---|---|---|---|---|---|---|---|---|---|---|---|
| hCoV-19/Brazil/FE-AM138/2020  | P | P | N | N | C | C | V | N | C | C | L | D | D | D | R | C | I | L | H | C | C | A | N | F | N | V | L | P | S | T | V | F | P | P | T | S | F | G | P | L | V | R | K | I | F | V | O | G | V |
| hCoV-19/Brazil/FE-AM08/2020   | P | P | N | N | C | C | C | C | C | L | D | D | D | D | R | C | I | L | H | C | C | A | N | F | N | V | L | P | S | T | V | F | P | P | T | S | F | G | P | L | V | R | K | I | F | V | O | G | V |
| hCoV-19/Brazil/FE-AM221/2020  | P | P | N | N | V | N | N | C | C | L | D | D | D | D | R | C | I | L | H | C | C | A | N | F | N | V | L | P | S | T | V | F | P | P | T | S | F | G | P | L | V | R | K | I | F | V | O | G | V |
| hCoV-19/Brazil/FE-AM10/2020   | P | P | N | N | V | N | N | C | C | L | D | D | D | D | R | C | I | L | H | C | C | A | N | F | N | V | L | P | S | T | V | F | P | P | T | S | F | G | P | L | V | R | K | I | F | V | O | G | V |
| hCoV-19/Brazil/FE-AM103/2020  | P | P | N | N | V | N | N | C | C | L | D | D | D | D | R | C | I | L | H | C | C | A | N | F | N | V | L | P | S | T | V | F | P | P | T | S | F | G | P | L | V | R | K | I | F | V | O | G | V |
| hCoV-19/Brazil/FE-AM139/2020  | P | P | N | N | V | N | N | C | C | L | D | D | D | D | R | C | I | L | H | C | C | A | N | F | N | V | L | P | S | T | V | F | P | P | T | S | F | G | P | L | V | R | K | I | F | V | O | G | V |
| hCoV-19/Brazil/FE-AM158/2020  | P | P | N | N | V | N | N | C | C | L | D | D | D | D | R | C | I | L | H | C | C | A | N | F | N | V | L | P | S | T | V | F | P | P | T | S | F | G | P | L | V | R | K | I | F | V | O | G | V |
| hCoV-19/Brazil/FE-AM16/2020   | P | P | N | N | V | N | N | C | C | L | D | D | D | D | R | C | I | L | H | C | C | A | N | F | N | V | L | P | S | T | V | F | P | P | T | S | F | G | P | L | V | R | K | I | F | V | O | G | V |
| hCoV-19/Brazil/FE-AM167/2020  | P | P | N | N | V | N | N | C | C | L | D | D | D | D | R | C | I | L | H | C | C | A | N | F | N | V | L | P | S | T | V | F | P | P | T | S | F | G | P | L | V | R | K | I | F | V | O | G | V |
| hCoV-19/Brazil/FE-AM17/2020   | P | P | N | N | V | N | N | C | C | L | D | D | D | D | R | C | I | L | H | C | C | A | N | F | N | V | L | P | S | T | V | F | P | P | T | S | F | G | P | L | V | R | K | I | F | V | O | G | V |
| hCoV-19/Brazil/FE-AM171/2020  | P | P | N | N | V | N | N | C | C | L | D | D | D | D | R | C | I | L | H | C | C | A | N | F | N | V | L | P | S | T | V | F | P | P | T | S | F | G | P | L | V | R | K | I | F | V | O | G | V |
| hCoV-19/Brazil/FE-AM18/2020   | P | P | N | N | V | N | N | C | C | L | D | D | D | D | R | C | I | L | H | C | C | A | N | F | N | V | L | P | S | T | V | F | P | P | T | S | F | G | P | L | V | R | K | I | F | V | O | G | V |
| hCoV-19/Brazil/FE-AM19/2020   | P | P | N | N | V | N | N | C | C | L | D | D | D | D | R | C | I | L | H | C | C | A | N | F | N | V | L | P | S | T | V | F | P | P | T | S | F | G | P | L | V | R | K | I | F | V | O | G | V |
| hCoV-19/Brazil/FE-AM209/2020  | P | P | N | N | V | N | N | C | C | L | D | D | D | D | R | C | I | L | H | C | C | A | N | F | N | V | L | P | S | T | V | F | P | P | T | S | F | G | P | L | V | R | K | I | F | V | O | G | V |
| hCoV-19/Brazil/FE-AM211/2020  | P | P | N | N | V | N | N | C | C | L | D | D | D | D | R | C | I | L | H | C | C | A | N | F | N | V | L | P | S | T | V | F | P | P | T | S | F | G | P | L | V | R | K | I | F | V | O | G | V |
| hCoV-19/Brazil/FE-AM212/2020  | P | P | N | N | V | N | N | C | C | L | D | D | D | D | R | C | I | L | H | C | C | A | N | F | N | V | L | P | S | T | V | F | P | P | T | S | F | G | P | L | V | R | K | I | F | V | O | G | V |
| hCoV-19/Brazil/FE-AM215/2020  | P | P | N | N | V | N | N | C | C | L | D | D | D | D | R | C | I | L | H | C | C | A | N | F | N | V | L | P | S | T | V | F | P | P | T | S | F | G | P | L | V | R | K | I | F | V | O | G | V |
| hCoV-19/Brazil/FE-AM220/2020  | P | P | N | N | V | N | N | C | C | L | D | D | D | D | R | C | I | L | H | C | C | A | N | F | N | V | L | P | S | T | V | F | P | P | T | S | F | G | P | L | V | R | K | I | F | V | O | G | V |
| hCoV-19/Brazil/FE-AM226/2020  | P | P | N | N | V | N | N | C | C | L | D | D | D | D | R | C | I | L | H | C | C | A | N | F | N | V | L | P | S | T | V | F | P | P | T | S | F | G | P | L | V | R | K | I | F | V | O | G | V |
| hCoV-19/Brazil/FE-AM230/2020  | P | P | N | N | V | N | N | C | C | L | D | D | D | D | R | C | I | L | H | C | C | A | N | F | N | V | L | P | S | T | V | F | P | P | T | S | F | G | P | L | V | R | K | I | F | V | O | G | V |
| hCoV-19/Brazil/FE-AM235/2020  | P | P | N | N | V | N | N | C | C | L | D | D | D | D | R | C | I | L | H | C | C | A | N | F | N | V | L | P | S | T | V | F | P | P | T | S | F | G | P | L | V | R | K | I | F | V | O | G | V |
| hCoV-19/Brazil/FE-AM238/2020  | P | P | N | N | V | N | N | C | C | L | D | D | D | D | R | C | I | L | H | C | C | A | N | F | N | V | L | P | S | T | V | F | P | P | T | S | F | G | P | L | V | R | K | I | F | V | O | G | V |
| hCoV-19/Brazil/FE-AM248/2020  | P | P | N | N | V | N | N | C | C | L | D | D | D | D | R | C | I | L | H | C | C | A | N | F | N | V | L | P | S | T | V | F | P | P | T | S | F | G | P | L | V | R | K | I | F | V | O | G | V |
| hCoV-19/Brazil/FE-AM273/2020  | P | P | N | N | V | N | N | C | C | L | D | D | D | D | R | C | I | L | H | C | C | A | N | F | N | V | L | P | S | T | V | F | P | P | T | S | F | G | P | L | V | R | K | I | F | V | O | G | V |
| hCoV-19/Brazil/FE-AM29/2020   | P | P | N | N | V | N | N | C | C | L | D | D | D | D | R | C | I | L | H | C | C | A | N | F | N | V | L | P | S | T | V | F | P | P | T | S | F | G | P | L | V | R | K | I | F | V | O | G | V |
| hCoV-19/Brazil/FE-AM291/2020  | P | P | N | N | V | N | N | C | C | L | D | D | D | D | R | C | I | L | H | C | C | A | N | F | N | V | L | P | S | T | V | F | P | P | T | S | F | G | P | L | V | R | K | I | F | V | O | G | V |
| hCoV-19/Brazil/FE-AM30/2020   | P | P | N | N | V | N | N | C | C | L | D | D | D | D | R | C | I | L | H | C | C | A | N | F | N | V | L | P | S | T | V | F | P | P | T | S | F | G | P | L | V | R | K | I | F | V | O | G | V |
| hCoV-19/Brazil/FE-AM305/2020  | P | P | N | N | V | N | N | C | C | L | D | D | D | D | R | C | I | L | H | C | C | A | N | F | N | V | L | P | S | T | V | F | P | P | T | S | F | G | P | L | V | R | K | I | F | V | O | G | V |
| hCoV-19/Brazil/FE-AM307/2020  | P | P | N | N | V | N | N | C | C | L | D | D | D | D | R | C | I | L | H | C | C | A | N | F | N | V | L | P | S | T | V | F | P | P | T | S | F | G | P | L | V | R | K | I | F | V | O | G | V |
| hCoV-19/Brazil/FE-AM311/2020  | P | P | N | N | V | N | N | C | C | L | D | D | D | D | R | C | I | L | H | C | C | A | N | F | N | V | L | P | S | T | V | F | P | P | T | S | F | G | P | L | V | R | K | I | F | V | O | G | V |
| hCoV-19/Brazil/FE-AM355/2020  | P | P | N | N | V | N | N | C | C | L | D | D | D | D | R | C | I | L | H | C | C | A | N | F | N | V | L | P | S | T | V | F | P | P | T | S | F | G | P | L | V | R | K | I | F | V | O | G | V |
| hCoV-19/Brazil/FE-AM356/2020  | P | P | N | N | V | N | N | C | C | L | D | D | D | D | R | C | I | L | H | C | C | A | N | F | N | V | L | P | S | T | V | F | P | P | T | S | F | G | P | L | V | R | K | I | F | V | O | G | V |
| hCoV-19/Brazil/FE-AM39/2020   | P | P | N | N | V | N | N | C | C | L | D | D | D | D | R | C | I | L | H | C | C | A | N | F | N | V | L | P | S | T | V | F | P | P | T | S | F | G | P | L | V | R | K | I | F | V | O | G | V |
| hCoV-19/Brazil/FE-AM48/2020   | P | P | N | N | V | N | N | C | C | L | D | D | D | D | R | C | I | L | H | C | C | A | N | F | N | V | L | P | S | T | V | F | P | P | T | S | F | G | P | L | V | R | K | I | F | V | O | G | V |
| hCoV-19/Brazil/FE-AM67/2020   | P | P | N | N | V | N | N | C | C | L | D | D | D | D | R | C | I | L | H | C | C | A | N | F | N | V | L | P | S | T | V | F | P | P | T | S | F | G | P | L | V | R | K | I | F | V | O | G | V |
| hCoV-19/Brazil/FE-AM84/2020   | P | P | N | N | V | N | N | C | C | L | D | D | D | D | R | C | I | L | H | C | C | A | N | F | N | V | L | P | S | T | V | F | P | P | T | S | F | G | P | L | V | R | K | I | F | V | O | G | V |
| hCoV-19/Brazil/FE-AM87/2020   | P | P | N | N | V | N | N | C | C | L | D | D | D | D | R | C | I | L | H | C | C | A | N | F | N | V | L | P | S | T | V | F | P | P | T | S | F | G | P | L | V | R | K | I | F | V | O | G | V |
| hCoV-19/Brazil/FE-AM89/2020   | P | P | N | N | V | N | N | C | C | L | D | D | D | D | R | C | I | L | H | C | C | A | N | F | N | V | L | P | S | T | V | F | P | P | T | S | F | G | P | L | V | R | K | I | F | V | O | G | V |
| hCoV-19/Brazil/FE-AM1447/2020 | P | P | N | N | V | N | N | C | C | L | D | D | D | D | R | C | I | L | H | C | C | A | N | F | N | V | L | P | S | T | V | F | P | P | T | S | F | G | P | L | V | R | K | I | F | V | O | G | V |
| hCoV-19/Brazil/FE-AM1451/2020 | P | P | N | N | V | N | N | C | C | L | D | D | D | D | R | C | I | L | H | C | C | A | N | F | N | V | L | P | S | T | V | F | P | P | T | S | F | G | P | L | V | R | K | I | F | V | O | G | V |
| hCoV-19/Brazil/FE-AM1458/2020 | P | P | N | N | V | N | N | C | C | L | D | D | D | D | R | C | I | L | H | C | C | A | N | F | N | V | L | P | S | T | V | F | P | P | T | S | F | G | P | L | V | R | K | I | F | V | O | G | V |
| hCoV-19/Brazil/FE-AM383/2020  | P | P | N | N | V | N | N | C | C | L | D | D | D | D | R | C | I | L | H | C | C | A | N | F | N | V | L | P | S | T | V | F | P | P | T | S | F | G | P | L | V | R | K | I | F | V | O | G | V |
| hCoV-19/Brazil/FE-AM384/2020  | P | P | N | N | V | N | N | C | C | L | D | D | D | D | R | C | I | L | H | C | C | A | N | F | N | V | L | P | S | T | V | F | P | P | T | S | F | G | P | L | V | R | K | I | F | V | O | G | V |
| hCoV-19/Brazil/FE-AM391/2020  | P | P | N | N | V | N | N | C | C | L | D | D | D | D | R | C | I | L | H | C | C | A | N | F | N | V | L | P | S | T | V | F | P | P | T | S | F | G | P | L | V | R | K | I | F | V | O | G | V |
| hCoV-19/Brazil/FE-AM395/2020  | P | P | N | N | V | N | N | C | C | L | D | D | D | D | R | C | I | L | H | C | C | A | N | F | N | V | L | P | S | T | V | F | P | P | T | S | F | G | P | L | V | R | K | I | F | V | O | G | V |
| hCoV-19/Brazil/FE-AM397/2020  | P | P | N | N | V | N | N | C | C | L | D | D | D | D | R | C | I |   |   |   |   |   |   |   |   |   |   |   |   |   |   |   |   |   |   |   |   |   |   |   |   |   |   |   |   |   |   |   |   |
